# Supplementary material
Source: publisher site journal article supplement (https://www.dovepress.com/article/564053)

**Supplementary Figure 1** The flow of patient selection and group allocation
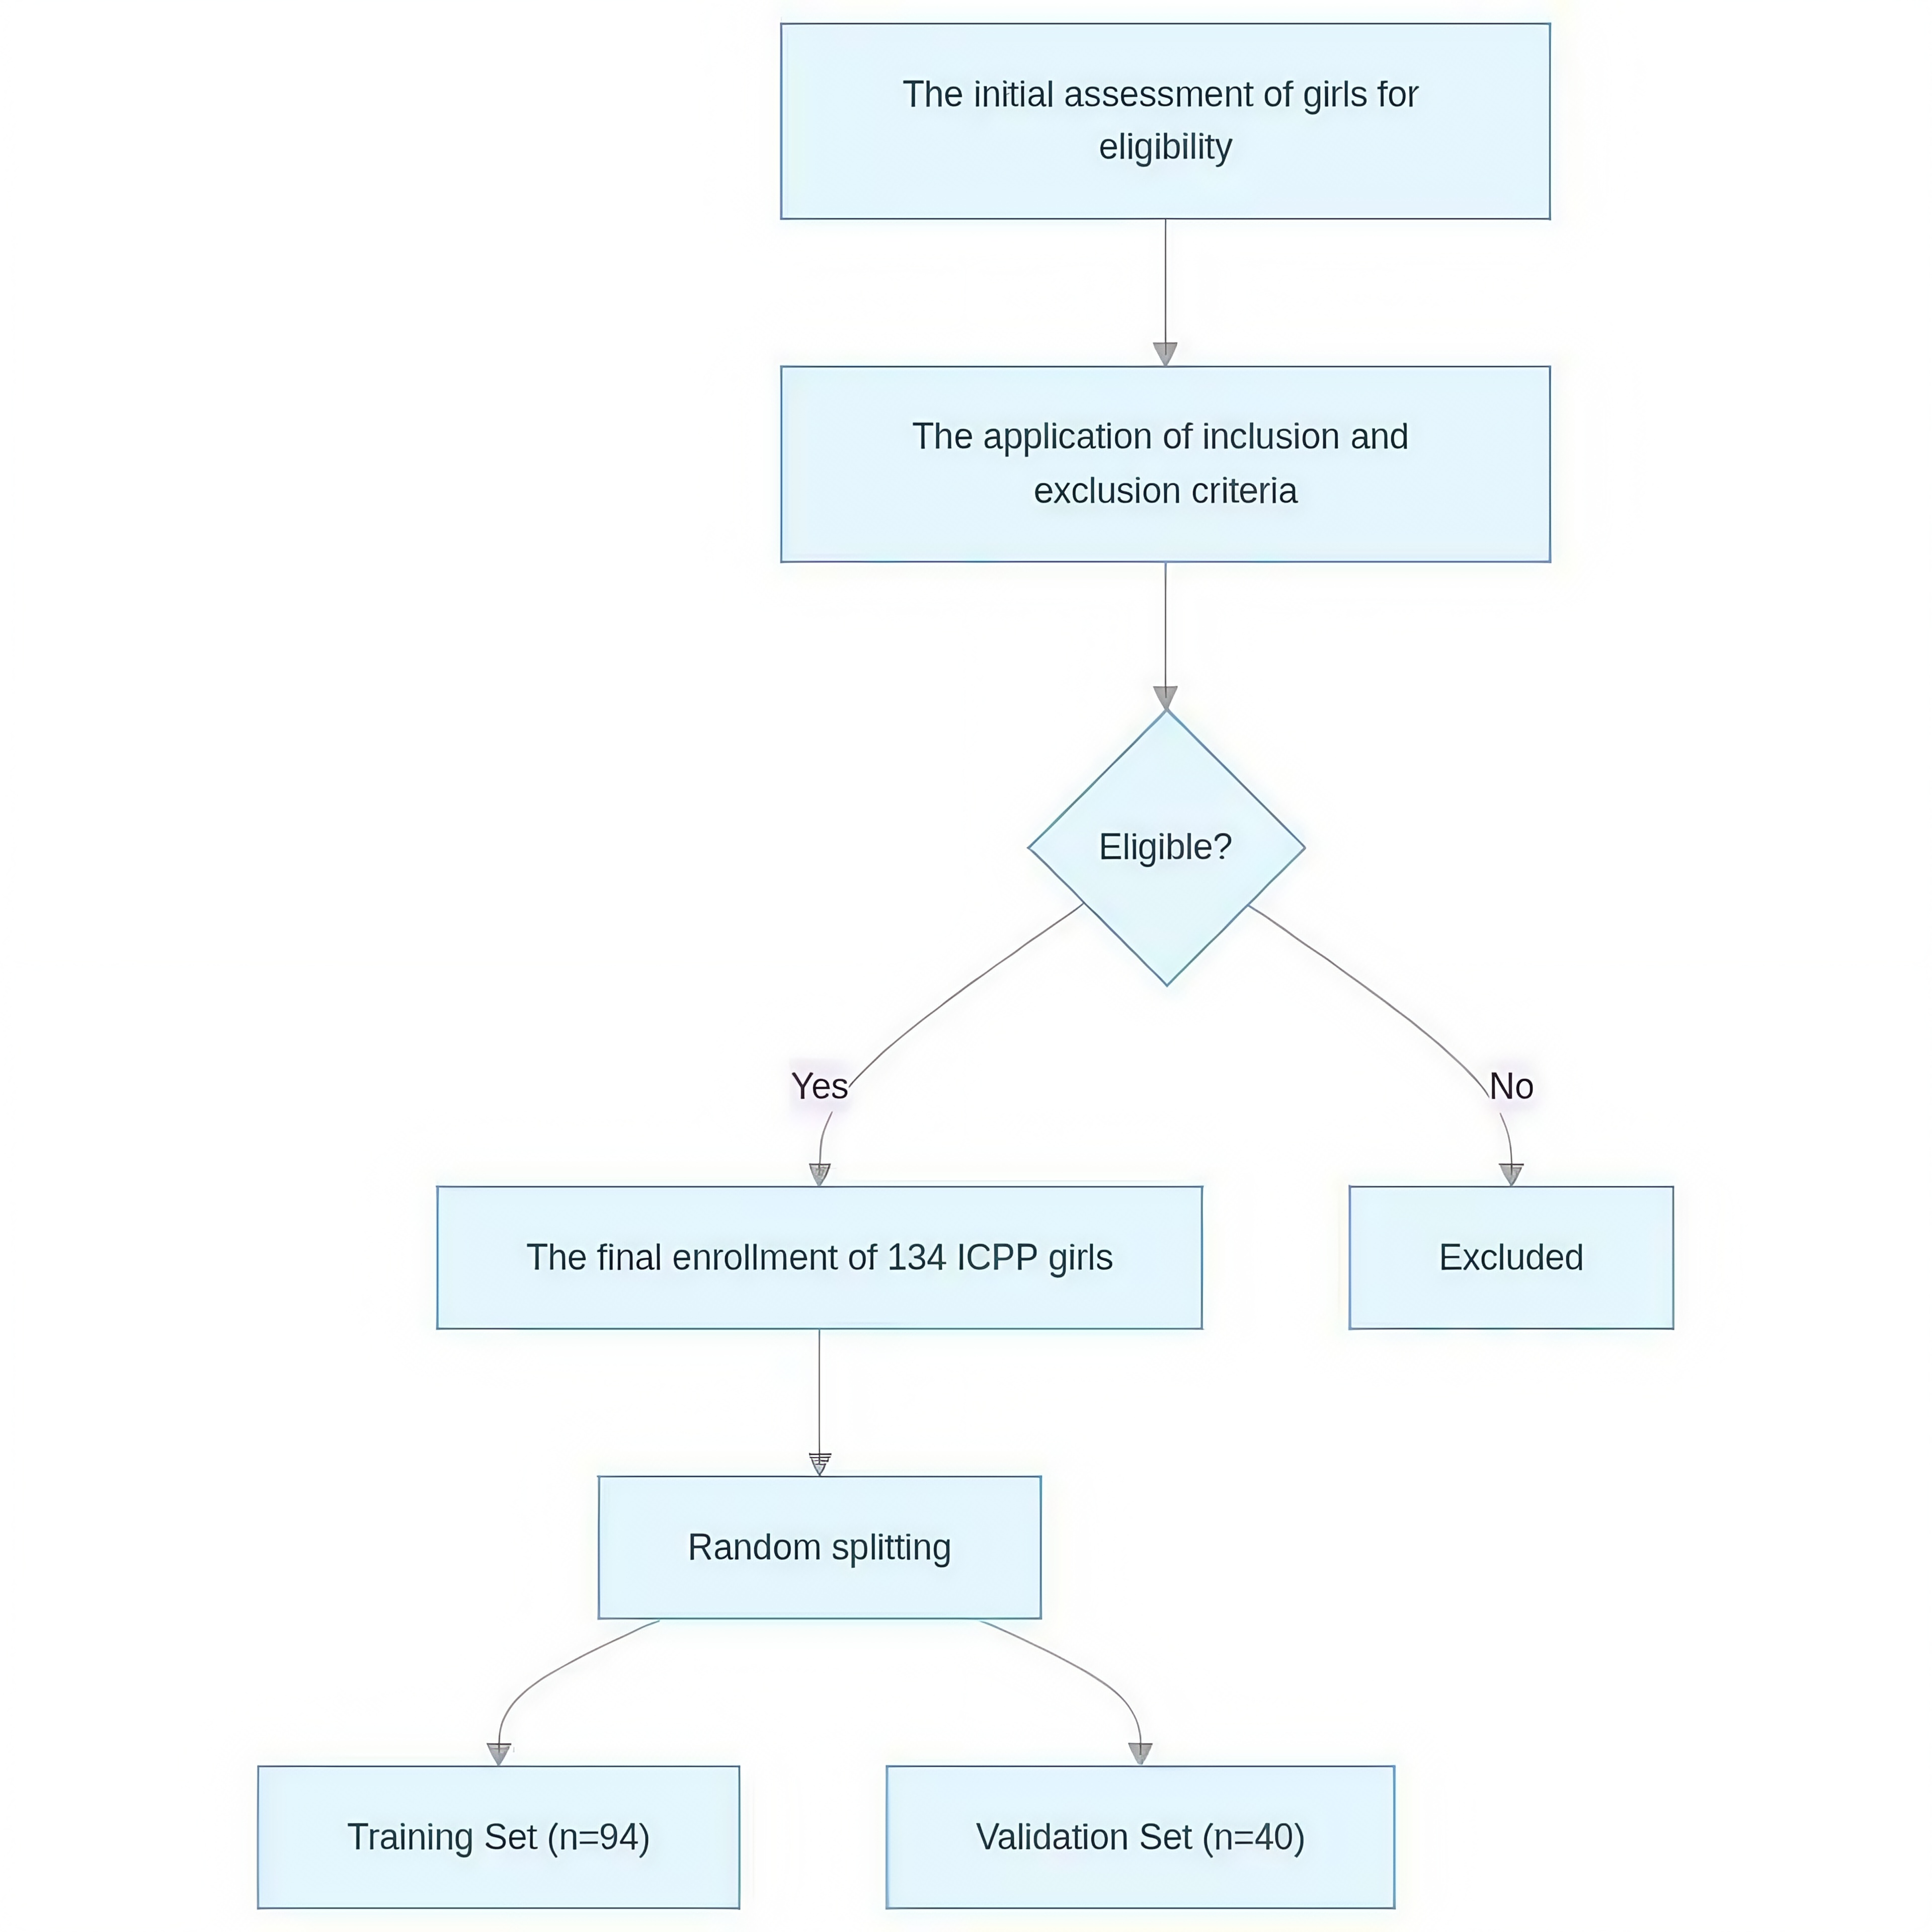

Supplement: Supplementary file 1 [file 564053%20Supplementary%20Figure%201.docx]
